# Supplementary material
Source: Springer Nature journal article supplement (https://www.springermedizin.de/resource/supplementary/12887_2013_1220_MOESM4_ESM.pdf/9476748)

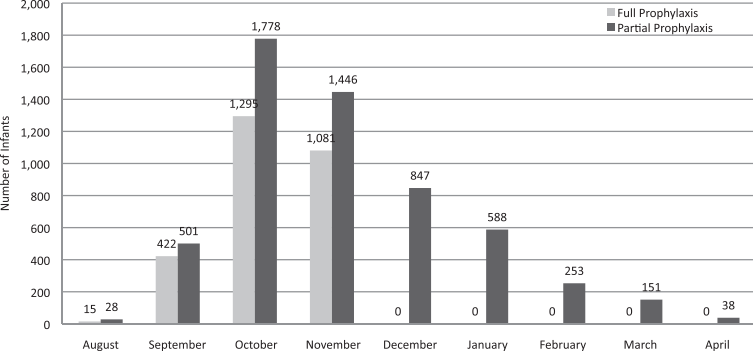

Supplement: MOESM4 [file 9476748]
